# Supplementary material
Source: PubMed Central journal article supplement (PMC10409883)
Supplement: NIHMS1874433-supplement-1.pdf [file NIHMS1874433-supplement-1.pdf]

## **SUPPLEMENTARY INFORMATION**

### **Impact of Copy Number Variants and Polygenic Risk Scores on Psychopathology in the UK Biobank**

*Mollon et al.*

**Table S1** List of 61 recurrent CNVs selected for analyses

| Locus                         | Gene(s)                       | CHR   | hg19 START | hg19 STOP |
|-------------------------------|-------------------------------|-------|------------|-----------|
| 1p36                          | <i>GABRD</i>                  | chr1  | 1          | 2500000   |
| 1q21.1 TAR                    | -                             | chr1  | 145394955  | 145807817 |
| 1q21.1 distal+TAR             | -                             | chr1  | 145394955  | 147394444 |
| 1q21.1 distal                 | -                             | chr1  | 146527987  | 147394444 |
| -                             | <i>NRXN1</i>                  | chr2  | 50145643   | 51259674  |
| 2q11.2                        | <i>ARID5A, LMAN2L</i>         | chr2  | 96742409   | 97677516  |
| 2q13                          | <i>NPHP1</i>                  | chr2  | 110862716  | 110983948 |
| 2q13                          | <i>BUB1</i>                   | chr2  | 111394040  | 112012649 |
| 2q21.1                        | -                             | chr2  | 131481308  | 131930677 |
| 2q37                          | <i>HDAC4</i>                  | chr2  | 239716679  | 243199373 |
| 3q29 proximal                 | <i>FGF12</i>                  | chr3  | 191517306  | 193017306 |
| 3q29 distal                   | <i>DLG1</i>                   | chr3  | 195720167  | 197354826 |
| 4p16.3 (WH)                   | -                             | chr4  | 1552030    | 2091303   |
| 5q35                          | -                             | chr5  | 175720924  | 177052594 |
| -                             | <i>SIM1</i>                   | chr6  | 100836750  | 100911811 |
| -                             | <i>ZNF92</i>                  | chr7  | 64838768   | 64865998  |
| 7q11.23 (WBS)                 | <i>GTF2I, GTF2IRD1</i>        | chr7  | 72744915   | 74142892  |
| 7q11.23 proximal              | -                             | chr7  | 73978801   | 74144177  |
| 7q11.23                       | <i>WBSCR16</i>                | chr7  | 74455447   | 74488775  |
| 7q11.23 distal                | -                             | chr7  | 75138294   | 76064412  |
| 7p36.3                        | <i>VIPR2, WDR60</i>           | chr7  | 158660506  | 159179546 |
| 8p23.1                        | -                             | chr8  | 8098990    | 11872558  |
| -                             | <i>VPS13B</i>                 | chr8  | 100025494  | 100889808 |
| -                             | <i>DMRT1</i>                  | chr9  | 841690     | 969090    |
| 9q34                          | <i>EHMT1</i>                  | chr9  | 140513444  | 140730578 |
| 10q11.21q11.23                | -                             | chr10 | 49390199   | 51058796  |
| 10q22q23                      | <i>GRID1, NRG3</i>            | chr10 | 82045472   | 88931651  |
| 11p11.2                       | -                             | chr11 | 43940000   | 46020000  |
| -                             | <i>ZMYM5</i>                  | chr13 | 20411593   | 20437773  |
| -                             | <i>CRYL1</i>                  | chr13 | 20977806   | 21100012  |
| 13q12.12                      | -                             | chr13 | 23555358   | 24884622  |
| 15q11.2                       | -                             | chr15 | 22805313   | 23094530  |
| 15q11.2q13.1 BP2-BP3 (PWS/AS) | -                             | chr15 | 22805313   | 28390339  |
| 15q12                         | <i>GABRA5, GABRB3, GABRG3</i> | chr15 | 26971834   | 27548820  |
| 15q13.1q13.2 BP3-BP4          | -                             | chr15 | 29161368   | 30375967  |
| 15q13.1q13.3 BP3-BP5          | -                             | chr15 | 29161368   | 32462776  |
| 15q13.3 BP4-BP5               | <i>CHRNA7</i>                 | chr15 | 31080645   | 32462776  |
| 15q13.3 BP4.5-BP5             | <i>CHRNA7</i>                 | chr15 | 32017070   | 32453068  |
| 15q24                         | -                             | chr15 | 72900171   | 78151253  |
| 15q25.2                       | -                             | chr15 | 83219735   | 85722039  |
| -                             | <i>CREBBP</i>                 | chr16 | 3775056    | 3930121   |
| 16p13.11                      | -                             | chr16 | 15511655   | 16293689  |
| 16p12.1                       | -                             | chr16 | 21950135   | 22431889  |
| 16p11.2 distal                | -                             | chr16 | 28823196   | 29046783  |
| 16p11.2 distal+proximal       | -                             | chr16 | 28823196   | 30200773  |
| 16p11.2 proximal              | -                             | chr16 | 29650840   | 30200773  |
| 16p11.2p12.1                  | -                             | chr16 | 21596415   | 28347808  |
| 16q23.3                       | <i>CDH13</i>                  | chr16 | 82660399   | 83830215  |
| -                             | <i>YWHAE</i>                  | chr17 | 1247834    | 1303556   |
| -                             | <i>PAFAH1B1</i>               | chr17 | 2496923    | 2588909   |
| 17p12                         | <i>PMP22</i>                  | chr17 | 14141387   | 15426961  |
| 17p11.2 (Potocki-Lupski/SMS)  | -                             | chr17 | 16812771   | 20211017  |
| 17q11.2                       | <i>NF1</i>                    | chr17 | 29107491   | 30265075  |
| 17q12                         | -                             | chr17 | 34815904   | 36217432  |
| 17q21.31                      | -                             | chr17 | 43705356   | 44164691  |
| 17q23.1q23.2                  | -                             | chr17 | 58302389   | 60289141  |
| 22q11.2 distal                | -                             | chr22 | 21920127   | 23653646  |
| 22q11.2 proximal              | -                             | chr22 | 19037332   | 21466726  |
| 22q13                         | <i>SHANK3</i>                 | chr22 | 51113070   | 51171640  |
| -                             | <i>MAGEA11</i>                | chrX  | 148793685  | 148798928 |
| Xq28                          | -                             | chrX  | 154146806  | 154571806 |

TAR = thrombocytopenia-absent radius; WH = Wolf-Hirschhorn; WBS = Williams-Beuren syndrome; PWS/AS = Prader-Willi syndrome / Angelman syndrome; SMS = Smith-Magenis syndrome.

**Table S2** Items and factor loadings for mood/anxiety confirmatory factor model (N=501,289)

| Touchscreen question                                                                         | Loading |
|----------------------------------------------------------------------------------------------|---------|
| Over the past two weeks, how often have you felt down, depressed, or hopeless?               | 0.858   |
| Does your mood often go up and down?                                                         | 0.804   |
| Do you often feel 'fed-up'?                                                                  | 0.803   |
| Over the past two weeks, how often have you had little interest or pleasure in doing things? | 0.770   |
| Do you ever feel 'just miserable' for no reason?                                             | 0.761   |
| Over the past two weeks, how often have you felt tense, fidgety or restless?                 | 0.761   |
| Would you call yourself tense or 'highly strung'?                                            | 0.726   |
| Would you call yourself a nervous person?                                                    | 0.716   |
| Are you a worrier?"                                                                          | 0.696   |
| Do you suffer from 'nerves'?                                                                 | 0.685   |
| Do you often feel lonely?                                                                    | 0.670   |
| Are you often troubled by feelings of guilt?                                                 | 0.638   |
| Are your feelings easily hurt?                                                               | 0.624   |
| Do you worry too long after an embarrassing experience?                                      | 0.609   |
| Are you an irritable person?                                                                 | 0.588   |
| Over the past two weeks, how often have you felt tired or had little energy?                 | 0.587   |

**Figure S1** Distribution of mood/anxiety factor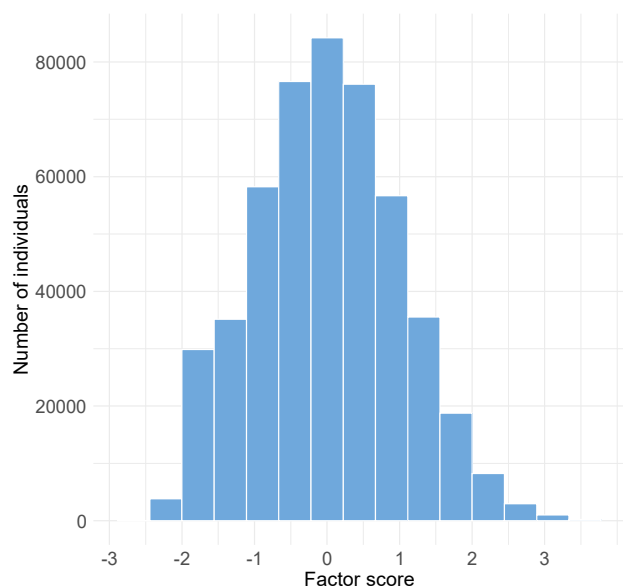

**Table S3** ICD-10 diagnoses and codes

| <b>Diagnosis</b>     | <b>Code(s)</b> | <b>N</b> |
|----------------------|----------------|----------|
| Dementia             | F00-F03        | 2,041    |
| Delirium             | F05            | 1,559    |
| Substance use        | F10-F19        | 23,909   |
| Psychosis            | F20-F29        | 1,546    |
| Mania                | F30            | 230      |
| Bipolar              | F31            | 1,447    |
| Depression           | F32            | 19,101   |
| Recurrent depression | F33            | 997      |
| Other mood           | F34-39         | 183      |
| Anxiety              | F40-F48        | 10,544   |
| Eating               | F50            | 137      |
| Sleep                | F51            | 72       |
| Personality          | F60            | 487      |
| Mental retardation   | F70-F79        | 101      |
| Development          | F80-F89        | 519      |
| Behavioral           | F90-F98        | 64       |
| Unspecified          | F99            | 287      |
| Any                  | F00-F99        | 50,501   |

ICD-10 = International Statistical Classification of Diseases and Related Health Problems, Tenth Revision

**Table S4** Sensitivity analyses: Standardized mean differences between CNV carriers and non-carriers on mood/anxiety factor scores for individuals of White British ancestry

| CNV             | Category                  | N      | $\beta$ | SE    | p                    |
|-----------------|---------------------------|--------|---------|-------|----------------------|
| Any CNV         | Intolerant                | 33,158 | 0.055   | 0.006 | $<2 \times 10^{-16}$ |
|                 | Recurrent                 | 14,355 | 0.084   | 0.008 | $<2 \times 10^{-16}$ |
|                 | Intolerant recurrent      | 8,363  | 0.122   | 0.011 | $<2 \times 10^{-16}$ |
|                 | Recurrent rare            | 6,020  | 0.146   | 0.013 | $<2 \times 10^{-16}$ |
|                 | Intolerant recurrent rare | 5,145  | 0.156   | 0.014 | $<2 \times 10^{-16}$ |
| Any deletion    | Intolerant                | 7,598  | 0.115   | 0.011 | $<2 \times 10^{-16}$ |
|                 | Recurrent                 | 5,666  | 0.138   | 0.013 | $<2 \times 10^{-16}$ |
|                 | Intolerant recurrent      | 2,808  | 0.199   | 0.018 | $<2 \times 10^{-16}$ |
|                 | Recurrent rare            | 2,235  | 0.166   | 0.021 | $1 \times 10^{-15}$  |
|                 | Intolerant recurrent rare | 1,462  | 0.195   | 0.026 | $3 \times 10^{-14}$  |
| Any duplication | Intolerant                | 25,560 | 0.037   | 0.006 | $3 \times 10^{-9}$   |
|                 | Recurrent                 | 8,547  | 0.047   | 0.011 | $<2 \times 10^{-16}$ |
|                 | Intolerant recurrent      | 5,441  | 0.082   | 0.013 | $7 \times 10^{-10}$  |
|                 | Recurrent rare            | 3,764  | 0.134   | 0.016 | $<2 \times 10^{-16}$ |
|                 | Intolerant recurrent rare | 3,662  | 0.139   | 0.016 | $<2 \times 10^{-16}$ |

$\beta$  coefficients correspond to standardized effect sizes, with values of 0.2, 0.5, and 0.8 indicating small, medium, and large effects, respectively.

Intolerant = CNV risk score (CRS) $>2.86$ ; Recurrent = any of the 61 neuropsychiatric recurrent CNVs; Intolerant recurrent = any of the 61 neuropsychiatric recurrent CNVs with a CRS $>2.86$ ; Recurrent rare = any of the 57 rare neuropsychiatric recurrent CNVs i.e., excluding the high frequency 2q13 (NPHP1), 15q11.2, 15q13.3 (CHRNA7), and ZNF92 CNVs; Intolerant recurrent rare = any of the 57 rare neuropsychiatric recurrent CNVs with a CRS $>2.86$  (i.e., excluding the high frequency 2q13 (NPHP1), 15q11.2, 15q13.3 (CHRNA7)).

**Table S5** Sensitivity analyses: Standardized mean differences between CNV carriers and non-carriers on mood/anxiety factor scores for individuals without ICD psychiatric diagnoses

| CNV             | Category                  | N      | $\beta$ | SE    | p                    |
|-----------------|---------------------------|--------|---------|-------|----------------------|
| Any CNV         | Intolerant                | 30,935 | 0.040   | 0.006 | $2 \times 10^{-12}$  |
|                 | Recurrent                 | 14,991 | 0.067   | 0.008 | $<2 \times 10^{-16}$ |
|                 | Intolerant recurrent      | 8,524  | 0.096   | 0.010 | $<2 \times 10^{-16}$ |
|                 | Recurrent rare            | 5,396  | 0.120   | 0.013 | $<2 \times 10^{-16}$ |
|                 | Intolerant recurrent rare | 4,590  | 0.126   | 0.014 | $<2 \times 10^{-16}$ |
| Any deletion    | Intolerant                | 6,915  | 0.087   | 0.012 | $4 \times 10^{-14}$  |
|                 | Recurrent                 | 5,765  | 0.116   | 0.012 | $<2 \times 10^{-16}$ |
|                 | Intolerant recurrent      | 2,800  | 0.167   | 0.018 | $<2 \times 10^{-16}$ |
|                 | Recurrent rare            | 1,965  | 0.132   | 0.022 | $1 \times 10^{-9}$   |
|                 | Intolerant recurrent rare | 1,259  | 0.151   | 0.027 | $2 \times 10^{-8}$   |
| Any duplication | Intolerant                | 24,020 | 0.026   | 0.006 | $5 \times 10^{-5}$   |
|                 | Recurrent                 | 9,100  | 0.035   | 0.010 | $5 \times 10^{-4}$   |
|                 | Intolerant recurrent      | 5,621  | 0.059   | 0.013 | $5 \times 10^{-6}$   |
|                 | Recurrent rare            | 3,418  | 0.114   | 0.016 | $4 \times 10^{-12}$  |
|                 | Intolerant recurrent rare | 3,318  | 0.117   | 0.017 | $2 \times 10^{-12}$  |

$\beta$  coefficients correspond to standardized effect sizes, with values of 0.2, 0.5, and 0.8 indicating small, medium, and large effects, respectively.

Intolerant = CNV risk score (CRS) $>2.86$ ; Recurrent = any of the 61 neuropsychiatric recurrent CNVs; Intolerant recurrent = any of the 61 neuropsychiatric recurrent CNVs with a CRS $>2.86$ ; Recurrent rare = any of the 57 rare neuropsychiatric recurrent CNVs i.e., excluding the high frequency 2q13 (NPHP1), 15q11.2, 15q13.3 (CHRNA7), and ZNF92 CNVs; Intolerant recurrent rare = any of the 57 rare neuropsychiatric recurrent CNVs with a CRS $>2.86$  (i.e., excluding the high frequency 2q13 (NPHP1), 15q11.2, 15q13.3 (CHRNA7)).

**Table S6** Associations between individual recurrent deletions and mood/anxiety factor

| Deletion                           | All participants |             |              |              |                          | White British |              |              |                           | Excluding psychiatric diagnoses |              |              |                           |
|------------------------------------|------------------|-------------|--------------|--------------|--------------------------|---------------|--------------|--------------|---------------------------|---------------------------------|--------------|--------------|---------------------------|
|                                    | CRS              | N           | $\beta$      | SE           | $p$                      | N             | $\beta$      | SE           | $p$                       | N                               | $\beta$      | SE           | $p$                       |
| <b>22q11.2 proximal with LCR-A</b> | <b>64.06</b>     | <b>10</b>   | <b>0.959</b> | <b>0.310</b> | <b>0.002</b>             | <b>10</b>     | <b>0.952</b> | <b>0.308</b> | <b>0.002</b>              | 6                               | 0.294        | 0.388        | 0.449                     |
| <b>10q11.21q11.23</b>              | <b>28.62</b>     | <b>61</b>   | <b>0.503</b> | <b>0.125</b> | <b>6×10<sup>-5</sup></b> | <b>54</b>     | <b>0.586</b> | <b>0.133</b> | <b>1×10<sup>-5</sup></b>  | <b>54</b>                       | <b>0.464</b> | <b>0.129</b> | <b>3×10<sup>-4</sup></b>  |
| <b>15q13.1q13.3 BP3-BP5</b>        | <b>8.69</b>      | <b>58</b>   | <b>0.416</b> | <b>0.129</b> | <b>0.001</b>             | <b>47</b>     | <b>0.416</b> | <b>0.142</b> | <b>0.003</b>              | <b>42</b>                       | <b>0.429</b> | <b>0.147</b> | <b>0.003</b>              |
| <b>16p13.11</b>                    | <b>24.21</b>     | <b>138</b>  | <b>0.392</b> | <b>0.083</b> | <b>0.000</b>             | <b>117</b>    | <b>0.361</b> | <b>0.090</b> | <b>0.000</b>              | <b>105</b>                      | <b>0.321</b> | <b>0.093</b> | <b>0.001</b>              |
| <b>16p11.2 distal BP2-BP3</b>      | <b>21.39</b>     | <b>58</b>   | <b>0.340</b> | <b>0.130</b> | <b>0.009</b>             | <b>51</b>     | <b>0.380</b> | <b>0.136</b> | <b>0.005</b>              | <b>46</b>                       | <b>0.333</b> | <b>0.142</b> | <b>0.019</b>              |
| 22q11.2 distal type II             | 9.57             | 46          | 0.323        | 0.144        | 0.025                    | 40            | 0.351        | 0.154        | 0.023                     | 38                              | 0.316        | 0.154        | 0.040                     |
| ZMYM5                              | 0.96             | 6           | 0.306        | 0.400        | 0.445                    | -             | -            | -            | -                         | 5                               | 0.013        | 0.425        | 0.976                     |
| 17q12                              | 37.34            | 8           | 0.290        | 0.346        | 0.402                    | 6             | 0.374        | 0.398        | 0.347                     | 6                               | 0.483        | 0.388        | 0.214                     |
| 15q13.3 ( <i>CHRNA7</i> )          | 1.30             | 8           | 0.284        | 0.346        | 0.413                    | 8             | 0.289        | 0.345        | 0.402                     | 6                               | -0.129       | 0.388        | 0.740                     |
| 2q21.1 ( <i>BUB1</i> )             | 5.81             | 44          | 0.277        | 0.148        | 0.061                    | 38            | 0.207        | 0.158        | 0.191                     | 40                              | 0.326        | 0.150        | 0.030                     |
| <b>16p12.1</b>                     | <b>9.03</b>      | <b>255</b>  | <b>0.258</b> | <b>0.061</b> | <b>3×10<sup>-5</sup></b> | <b>228</b>    | <b>0.247</b> | <b>0.065</b> | <b>1×10<sup>-4</sup></b>  | <b>208</b>                      | <b>0.200</b> | <b>0.066</b> | <b>0.002</b>              |
| <b>16p11.2 proximal BP4-BP5</b>    | <b>40.03</b>     | <b>126</b>  | <b>0.225</b> | <b>0.088</b> | <b>0.011</b>             | <b>96</b>     | <b>0.298</b> | <b>0.100</b> | <b>0.003</b>              | <b>85</b>                       | <b>0.207</b> | <b>0.104</b> | <b>0.047</b>              |
| 1q21.1 distal TAR                  | 19.70            | 11          | 0.211        | 0.295        | 0.475                    | 10            | 0.192        | 0.308        | 0.534                     | 8                               | 0.425        | 0.336        | 0.206                     |
| <b>15q11.2</b>                     | <b>6.91</b>      | <b>1746</b> | <b>0.189</b> | <b>0.024</b> | <b>1×10<sup>-5</sup></b> | <b>1553</b>   | <b>0.195</b> | <b>0.025</b> | <b>4×10<sup>-15</sup></b> | <b>1573</b>                     | <b>0.177</b> | <b>0.024</b> | <b>2×10<sup>-13</sup></b> |
| 22q11.2 proximal without LCR-A     | 10.53            | 36          | 0.177        | 0.163        | 0.279                    | 27            | 0.131        | 0.188        | 0.485                     | 26                              | -0.060       | 0.187        | 0.749                     |
| <b><i>NRXN1</i></b>                | <b>3.94</b>      | <b>287</b>  | <b>0.164</b> | <b>0.058</b> | <b>0.005</b>             | <b>247</b>    | <b>0.175</b> | <b>0.062</b> | <b>0.005</b>              | <b>253</b>                      | <b>0.154</b> | <b>0.060</b> | <b>0.010</b>              |
| 2q11.2                             | 44.46            | 34          | 0.134        | 0.168        | 0.424                    | 28            | 0.113        | 0.184        | 0.541                     | 30                              | 0.071        | 0.174        | 0.683                     |
| <i>PAFAH1B1</i>                    | 16.03            | 6           | 0.125        | 0.400        | 0.754                    | 5             | 0.175        | 0.436        | 0.688                     | 6                               | 0.184        | 0.388        | 0.635                     |
| <b><i>CRYL1</i></b>                | <b>1.52</b>      | <b>401</b>  | <b>0.125</b> | <b>0.049</b> | <b>0.011</b>             | 360           | 0.118        | 0.051        | 0.021                     | 357                             | 0.107        | 0.050        | 0.034                     |
| 17p12 ( <i>HNPP, CMT1A</i> )       | 8.63             | 263         | 0.084        | 0.060        | 0.165                    | 220           | 0.082        | 0.066        | 0.212                     | 234                             | 0.063        | 0.062        | 0.313                     |
| <b>2q13 (<i>NPHP1</i>)</b>         | <b>1.74</b>      | <b>2617</b> | <b>0.066</b> | <b>0.019</b> | <b>0.001</b>             | <b>2259</b>   | <b>0.069</b> | <b>0.021</b> | <b>0.001</b>              | <b>2342</b>                     | <b>0.061</b> | <b>0.020</b> | <b>0.002</b>              |
| 1q21.1 distal                      | 10.44            | 107         | 0.049        | 0.095        | 0.602                    | 93            | -0.020       | 0.101        | 0.845                     | 94                              | 0.039        | 0.098        | 0.694                     |
| 13q12.12                           | 8.78             | 86          | 0.049        | 0.106        | 0.641                    | 79            | 0.079        | 0.110        | 0.472                     | 80                              | 0.108        | 0.106        | 0.310                     |
| <i>SIM1</i>                        | 3.95             | 6           | 0.049        | 0.400        | 0.903                    | 5             | 0.393        | 0.436        | 0.367                     | 5                               | -0.293       | 0.425        | 0.491                     |
| <i>VPS13B</i>                      | 1.54             | 38          | 0.043        | 0.159        | 0.787                    | 33            | -0.055       | 0.170        | 0.748                     | 32                              | 0.012        | 0.168        | 0.942                     |
| 3q29 distal                        | 41.32            | 10          | 0.014        | 0.310        | 0.963                    | 9             | -0.104       | 0.325        | 0.749                     | -                               | -            | -            | -                         |
| <i>ZNF92</i>                       | 0.54             | 3274        | 0.011        | 0.017        | 0.527                    | 2639          | 0.016        | 0.019        | 0.399                     | 2924                            | 0.006        | 0.018        | 0.742                     |
| 1q21.1 TAR                         | 19.70            | 151         | -0.019       | 0.080        | 0.810                    | 130           | 0.058        | 0.085        | 0.497                     | 140                             | -0.049       | 0.080        | 0.539                     |
| 17q11.2 ( <i>NF1</i> )             | 35.36            | 12          | -0.031       | 0.283        | 0.913                    | 10            | -0.107       | 0.308        | 0.729                     | 12                              | 0.027        | 0.275        | 0.922                     |
| 2q13                               | 15.84            | 60          | -0.034       | 0.126        | 0.786                    | 54            | -0.060       | 0.133        | 0.649                     | 54                              | -0.085       | 0.129        | 0.510                     |
| 15q13.1q13.2 BP3-BP4               | 20.13            | 10          | -0.073       | 0.326        | 0.823                    | 9             | -0.065       | 0.325        | 0.841                     | 7                               | -0.193       | 0.359        | 0.592                     |
| 16q23.3                            | 2.39             | 18          | -0.104       | 0.231        | 0.651                    | 13            | -0.418       | 0.270        | 0.122                     | 16                              | -0.100       | 0.238        | 0.675                     |
| <i>DMRT1</i>                       | 6.07             | 16          | -0.243       | 0.245        | 0.322                    | 13            | -0.159       | 0.270        | 0.556                     | 16                              | -0.183       | 0.238        | 0.442                     |
| 4p16.3                             | 7.18             | 6           | -0.413       | 0.400        | 0.302                    | 5             | -0.117       | 0.436        | 0.788                     | -                               | -            | -            | -                         |

$\beta$  coefficients correspond to standardized effect sizes, with values of 0.2, 0.5, and 0.8 indicating small, medium, and large effects, respectively.

Bolded estimates signify statistical significance ( $p_{FDR} < 0.05$ ).

CRS = CNV risk score; LCR = low-copy repeat; BP = breakpoint; TAR = thrombocytopenia-absent radius.

**Table S7** Associations between individual recurrent duplications and mood/anxiety factor

| Duplication                        | All participants |            |               |              |                           | White British |               |              |                           | Excluding psychiatric diagnoses |               |              |              |
|------------------------------------|------------------|------------|---------------|--------------|---------------------------|---------------|---------------|--------------|---------------------------|---------------------------------|---------------|--------------|--------------|
|                                    | CRS              | N          | $\beta$       | SE           | <i>p</i>                  | N             | $\beta$       | SE           | <i>p</i>                  | N                               | $\beta$       | SE           | <i>p</i>     |
| <b>8p23.1</b>                      | <b>12.75</b>     | <b>7</b>   | <b>1.087</b>  | <b>0.370</b> | <b>0.003</b>              | <b>6</b>      | <b>1.241</b>  | <b>0.398</b> | <b>0.002</b>              | <b>5</b>                        | <b>1.278</b>  | <b>0.425</b> | <b>0.003</b> |
| <b>15q11.2q13.1 BP2-BP3 PWS/AS</b> | <b>31.73</b>     | <b>19</b>  | <b>0.936</b>  | <b>0.225</b> | <b>3×10<sup>-5</sup></b>  | <b>17</b>     | <b>0.865</b>  | <b>0.236</b> | <b>3×10<sup>-4</sup></b>  | <b>11</b>                       | <b>0.804</b>  | <b>0.287</b> | <b>0.005</b> |
| 3q29 proximal                      | 7.14             | 7          | 0.790         | 0.370        | 0.033                     | 6             | 0.897         | 0.398        | 0.024                     | 7                               | 0.851         | 0.359        | 0.018        |
| 10q22q23 ( <i>NRG3, GRID1</i> )    | 44.32            | 8          | 0.744         | 0.346        | 0.032                     | 7             | 0.771         | 0.368        | 0.036                     | 7                               | 0.650         | 0.359        | 0.071        |
| <b>22q11.2 proximal with LCR-A</b> | <b>76.42</b>     | <b>287</b> | <b>0.545</b>  | <b>0.058</b> | <b>2×10<sup>-16</sup></b> | <b>254</b>    | <b>0.552</b>  | <b>0.061</b> | <b>2×10<sup>-16</sup></b> | <b>249</b>                      | <b>0.525</b>  | <b>0.060</b> | <b>0.000</b> |
| <b>16p11.2 proximal BP4-BP5</b>    | <b>40.03</b>     | <b>147</b> | <b>0.435</b>  | <b>0.081</b> | <b>8×10<sup>-8</sup></b>  | <b>135</b>    | <b>0.418</b>  | <b>0.084</b> | <b>6×10<sup>-7</sup></b>  | <b>122</b>                      | <b>0.360</b>  | <b>0.086</b> | <b>0.000</b> |
| 1q21.1 distal TAR                  | 31.89            | 20         | 0.433         | 0.219        | 0.048                     | 15            | 0.439         | 0.252        | 0.081                     | 17                              | 0.268         | 0.231        | 0.245        |
| 15q24                              | 25.47            | 9          | 0.418         | 0.326        | 0.201                     | 8             | -0.496        | 0.345        | 0.150                     | 7                               | 0.534         | 0.359        | 0.137        |
| 7q11.23 WBS                        | 51.74            | 17         | 0.360         | 0.237        | 0.129                     | 13            | 0.528         | 0.270        | 0.051                     | 15                              | -0.255        | 0.246        | 0.299        |
| <b>1q21.1 distal</b>               | <b>10.44</b>     | <b>169</b> | <b>0.359</b>  | <b>0.075</b> | <b>2×10<sup>-6</sup></b>  | <b>148</b>    | <b>0.390</b>  | <b>0.080</b> | <b>1×10<sup>-6</sup></b>  | <b>145</b>                      | <b>0.332</b>  | <b>0.079</b> | <b>0.000</b> |
| <b>16p11.2 distal BP2-BP3</b>      | <b>21.93</b>     | <b>115</b> | <b>0.255</b>  | <b>0.091</b> | <b>0.005</b>              | <b>105</b>    | <b>0.244</b>  | <b>0.095</b> | <b>0.010</b>              | <b>95</b>                       | <b>0.269</b>  | <b>0.098</b> | <b>0.006</b> |
| 4p16.3                             | 7.18             | 11         | 0.200         | 0.295        | 0.499                     | 9             | 0.029         | 0.325        | 0.928                     | 9                               | 0.081         | 0.317        | 0.798        |
| 17p12 ( <i>HNPP, CMT1A</i> )       | 8.63             | 137        | 0.171         | 0.084        | 0.040                     | 116           | 0.206         | 0.090        | 0.023                     | 111                             | 0.145         | 0.090        | 0.108        |
| 15q13.3 BP4-BP5 ( <i>CHRNA7</i> )  | 8.69             | 65         | 0.159         | 0.121        | 0.189                     | 56            | -0.263        | 0.130        | 0.044                     | 58                              | 0.147         | 0.125        | 0.238        |
| <b>15q13.1q13.3 BP3-BP5</b>        | <b>8.69</b>      | <b>250</b> | <b>0.158</b>  | <b>0.062</b> | <b>0.011</b>              | <b>214</b>    | <b>0.109</b>  | <b>0.067</b> | <b>0.102</b>              | <b>223</b>                      | <b>0.139</b>  | <b>0.064</b> | <b>0.029</b> |
| <b>1q21.1 TAR</b>                  | <b>19.70</b>     | <b>442</b> | <b>0.148</b>  | <b>0.047</b> | <b>0.002</b>              | <b>388</b>    | <b>0.129</b>  | <b>0.049</b> | <b>0.009</b>              | <b>390</b>                      | <b>0.135</b>  | <b>0.048</b> | <b>0.005</b> |
| 22q11.2 distal type III            | 30.85            | 208        | 0.140         | 0.068        | 0.040                     | 178           | 0.158         | 0.073        | 0.030                     | 181                             | 0.104         | 0.071        | 0.143        |
| 22q11.2 distal type II             | 9.57             | 49         | 0.124         | 0.141        | 0.382                     | 47            | 0.083         | 0.142        | 0.561                     | 38                              | 0.023         | 0.156        | 0.884        |
| 2q21.1 ( <i>BUB1</i> )             | 5.81             | 62         | 0.089         | 0.124        | 0.474                     | 54            | 0.108         | 0.133        | 0.416                     | 59                              | 0.119         | 0.124        | 0.335        |
| 16p12.1                            | 9.03             | 196        | 0.057         | 0.070        | 0.418                     | 173           | 0.057         | 0.074        | 0.442                     | 178                             | 0.077         | 0.071        | 0.278        |
| 17q12                              | 37.08            | 105        | 0.055         | 0.096        | 0.564                     | 95            | 0.085         | 0.100        | 0.397                     | 90                              | 0.004         | 0.100        | 0.965        |
| <i>ZNF92</i>                       | 0.54             | 237        | 0.047         | 0.064        | 0.465                     | 202           | 0.075         | 0.069        | 0.274                     | 214                             | 0.089         | 0.065        | 0.173        |
| 2q13                               | 15.11            | 74         | 0.041         | 0.114        | 0.718                     | 68            | 0.028         | 0.118        | 0.816                     | 67                              | 0.023         | 0.116        | 0.843        |
| 2q11.2                             | 44.46            | 32         | 0.029         | 0.173        | 0.868                     | 28            | 0.083         | 0.184        | 0.651                     | 28                              | 0.037         | 0.180        | 0.837        |
| 7q11.23 distal                     | 9.17             | 29         | 0.010         | 0.182        | 0.954                     | 22            | -0.045        | 0.208        | 0.829                     | 29                              | 0.068         | 0.177        | 0.698        |
| 15q13.3 ( <i>CHRNA7</i> )          | 1.30             | 3089       | 0.005         | 0.018        | 0.790                     | 2660          | 0.003         | 0.019        | 0.874                     | 2819                            | 0.009         | 0.018        | 0.626        |
| 16p13.11                           | 23.67            | 890        | -0.007        | 0.033        | 0.842                     | 775           | -0.021        | 0.035        | 0.553                     | 795                             | -0.007        | 0.034        | 0.834        |
| 2q13 ( <i>NPHP1</i> )              | 1.74             | 1117       | -0.021        | 0.029        | 0.480                     | 784           | -0.043        | 0.035        | 0.216                     | 1004                            | -0.023        | 0.030        | 0.442        |
| 22q11.2 proximal without LCR-A     | 23.36            | 209        | -0.024        | 0.068        | 0.728                     | 178           | -0.027        | 0.073        | 0.707                     | 188                             | -0.039        | 0.069        | 0.573        |
| 15q11.2                            | 6.91             | 2268       | -0.027        | 0.021        | 0.193                     | 1849          | -0.008        | 0.023        | 0.735                     | 2003                            | -0.032        | 0.021        | 0.132        |
| <i>ZMYM5</i>                       | 6.48             | 81         | -0.028        | 0.109        | 0.796                     | 66            | -0.074        | 0.120        | 0.538                     | 71                              | -0.046        | 0.113        | 0.681        |
| 13q12.12                           | 8.78             | 255        | -0.037        | 0.061        | 0.545                     | 221           | -0.055        | 0.066        | 0.401                     | 228                             | -0.097        | 0.063        | 0.124        |
| 10q11.21q11.23                     | 33.70            | 44         | -0.051        | 0.148        | 0.729                     | 38            | -0.037        | 0.158        | 0.815                     | 39                              | -0.024        | 0.152        | 0.876        |
| 16q23.3                            | 2.39             | 61         | -0.052        | 0.125        | 0.676                     | 55            | -0.042        | 0.131        | 0.750                     | 58                              | 0.036         | 0.125        | 0.776        |
| 22q11.2 distal type I              | 25.86            | 9          | -0.068        | 0.326        | 0.835                     | 9             | -0.068        | 0.325        | 0.835                     | 8                               | -0.101        | 0.336        | 0.765        |
| <i>YWHAE</i>                       | 14.19            | 10         | -0.080        | 0.310        | 0.797                     | 9             | -0.164        | 0.325        | 0.613                     | 6                               | -0.582        | 0.388        | 0.134        |
| <i>CRYL1</i>                       | 3.43             | 5          | -0.160        | 0.438        | 0.716                     | -             | -             | -            | -                         | 5                               | -0.098        | 0.425        | 0.818        |
| 17p11.2 Potocki-Lupski/SMS         | 22.51            | 6          | -0.191        | 0.400        | 0.632                     | 5             | -0.106        | 0.436        | 0.808                     | -                               | -             | -            | -            |
| 16p11.2 distal BP1-BP2-BP3         | 31.26            | 12         | -0.192        | 0.283        | 0.496                     | 10            | -0.377        | 0.308        | 0.221                     | 10                              | -0.194        | 0.301        | 0.519        |
| 17q21.31                           | 2.28             | 6          | -0.369        | 0.400        | 0.356                     | 6             | -0.367        | 0.398        | 0.357                     | -                               | -             | -            | -            |
| 15q13.1q13.2 BP3-BP4               | 19.08            | 24         | -0.374        | 0.200        | 0.062                     | 20            | -0.421        | 0.218        | 0.053                     | 23                              | -0.341        | 0.198        | 0.086        |
| <b><i>DMRT1</i></b>                | <b>5.32</b>      | <b>16</b>  | <b>-0.627</b> | <b>0.245</b> | <b>0.010</b>              | <b>15</b>     | <b>-0.588</b> | <b>0.252</b> | <b>0.019</b>              | <b>16</b>                       | <b>-0.565</b> | <b>0.238</b> | <b>0.017</b> |
| 15q12 ( <i>GABRB3, GABRA5</i> )    | 8.22             | 8          | -0.666        | 0.346        | 0.054                     | 7             | -0.693        | 0.368        | 0.060                     | 8                               | -0.728        | 0.336        | 0.030        |

$\beta$  coefficients correspond to standardized effect sizes, with values of 0.2, 0.5, and 0.8 indicating small, medium, and large effects, respectively.

Bolded estimates signify statistical significance ( $p_{FDR}<0.05$ ).

CRS = CNV risk score; LCR = low-copy repeat; BP = breakpoint; TAR = thrombocytopenia-absent radius; WH = Wolf-Hirschhorn; WBS = Williams-Beuren syndrome; PWS/AS = Prader-Willi syndrome / Angelman syndrome; SMS = Smith-Magenis syndrome.

**Table S8** CNV×PRS interactions between individual recurrent deletions and MDD PRS

| CNV                                  | N         | $\beta$       | SE           | <i>p</i>     |
|--------------------------------------|-----------|---------------|--------------|--------------|
| 15q13.3 ( <i>CHRNA7</i> )            | <b>8</b>  | <b>0.814</b>  | <b>0.339</b> | <b>0.017</b> |
| 3q29 distal                          | 9         | 0.424         | 0.442        | 0.338        |
| <i>PAFAH1B1</i>                      | 5         | 0.283         | 0.649        | 0.662        |
| 17q11.2 ( <i>NF1</i> )               | 10        | 0.255         | 0.315        | 0.418        |
| <i>SIM1</i>                          | 5         | 0.208         | 0.601        | 0.729        |
| 2q21.1 ( <i>BUB1</i> )               | 38        | 0.198         | 0.196        | 0.311        |
| 10q11.21q11.23                       | 54        | 0.182         | 0.126        | 0.148        |
| 15q13.1q13.2 BP3-BP4                 | 9         | 0.144         | 0.364        | 0.692        |
| <i>VPS13B</i>                        | 33        | 0.121         | 0.168        | 0.472        |
| 16p12.1                              | 228       | 0.089         | 0.063        | 0.158        |
| 16p11.2 proximal BP4 BP5             | 96        | 0.082         | 0.098        | 0.401        |
| 17p12 ( <i>HNPP</i> , <i>CMT1A</i> ) | 220       | 0.058         | 0.072        | 0.421        |
| 22q11.2 distal type II               | 40        | 0.043         | 0.124        | 0.728        |
| 1q21.1 distal                        | 93        | 0.042         | 0.095        | 0.659        |
| 2q13                                 | 54        | 0.034         | 0.154        | 0.826        |
| <i>CRYL1</i>                         | 360       | 0.021         | 0.051        | 0.672        |
| 15q11.2                              | 1553      | 0.010         | 0.025        | 0.692        |
| <i>ZNF92</i>                         | 2639      | 0.007         | 0.020        | 0.713        |
| <i>DMRT1</i>                         | 13        | 0.005         | 0.249        | 0.983        |
| 2q13 ( <i>NPHP1</i> )                | 2259      | -0.004        | 0.021        | 0.837        |
| 2q11.2                               | 28        | -0.027        | 0.167        | 0.874        |
| <i>NRXN1</i>                         | 247       | -0.059        | 0.061        | 0.334        |
| 17q12                                | 6         | -0.062        | 0.513        | 0.904        |
| 16p11.2 distal BP2-BP3               | 51        | -0.078        | 0.134        | 0.562        |
| 1q21.1 TAR                           | 130       | -0.085        | 0.089        | 0.339        |
| 13q12.12                             | 79        | -0.085        | 0.106        | 0.423        |
| 16p13.11                             | 117       | -0.095        | 0.090        | 0.291        |
| 16q23.3                              | 13        | -0.127        | 0.319        | 0.690        |
| 1q21.1 distal TAR                    | 10        | -0.134        | 0.308        | 0.664        |
| 22q11.2 proximal without LCR-A       | 27        | -0.165        | 0.204        | 0.419        |
| 22q11.2 proximal with LCR-A          | 10        | -0.216        | 0.371        | 0.560        |
| 15q13.1q13.3 BP3-BP5                 | <b>47</b> | <b>-0.273</b> | <b>0.135</b> | <b>0.044</b> |
| 4p16.3                               | 5         | -0.527        | 0.483        | 0.275        |

MDD = major depressive disorder; PRS = polygenic risk score.

$\beta$  coefficients correspond to standardized effect sizes, with values of 0.2, 0.5, and 0.8 indicating small, medium, and large effects.

Bolded estimates signify nominal significance ( $p < 0.05$ ).

CRS = CNV risk score; LCR = low-copy repeat; BP = breakpoint; TAR = thrombocytopenia-absent radius.



**Table S9** CNV×PRS interactions between individual recurrent duplications and MDD PRS

| CNV                                     | N          | $\beta$       | SE           | $p$          |
|-----------------------------------------|------------|---------------|--------------|--------------|
| 15q24                                   | 8          | 0.655         | 0.572        | 0.252        |
| <i>YWHAE</i>                            | 9          | 0.487         | 0.267        | 0.068        |
| 1q21.1 distal TAR                       | 15         | 0.372         | 0.303        | 0.219        |
| 17q21.31                                | 6          | 0.233         | 0.489        | 0.633        |
| 10q11.21q11.23                          | 38         | 0.158         | 0.169        | 0.350        |
| 2q21.1 <i>BUB1</i>                      | 54         | 0.144         | 0.116        | 0.214        |
| 1q21.1 distal                           | 148        | 0.127         | 0.079        | 0.110        |
| 15q12 ( <i>GABRB3</i> , <i>GABRA5</i> ) | 7          | 0.108         | 0.336        | 0.748        |
| 22q11.2 distal type III                 | 178        | 0.099         | 0.072        | 0.169        |
| 7q11.23 distal                          | 22         | 0.095         | 0.246        | 0.699        |
| 8p23.1                                  | 6          | 0.086         | 0.466        | 0.853        |
| <i>ZNF92</i>                            | 202        | 0.051         | 0.073        | 0.481        |
| 17p12 ( <i>HNPP</i> , <i>CMT1A</i> )    | 116        | 0.051         | 0.090        | 0.570        |
| 16p12.1                                 | 173        | 0.049         | 0.077        | 0.524        |
| 2q13 ( <i>NPHP1</i> )                   | 784        | 0.039         | 0.034        | 0.247        |
| 16p13.11                                | 775        | 0.035         | 0.037        | 0.351        |
| 16q23.3                                 | 55         | 0.033         | 0.115        | 0.775        |
| 16p11.2 proximal BP4-BP5                | 135        | 0.028         | 0.080        | 0.728        |
| <i>DMRT1</i>                            | 15         | 0.025         | 0.241        | 0.916        |
| 15q13.1q13.3 BP3-BP5                    | 214        | 0.016         | 0.069        | 0.820        |
| 1q21.1 TAR                              | 388        | 0.015         | 0.050        | 0.769        |
| 15q13.3 ( <i>CHRNA7</i> )               | 2660       | 0.008         | 0.020        | 0.700        |
| 22q11.2 distal type II                  | 47         | 0.000         | 0.138        | 0.998        |
| <i>ZMYM5</i>                            | 66         | 0.000         | 0.134        | 1.000        |
| 15q11.2                                 | 1849       | -0.014        | 0.023        | 0.544        |
| 16p11.2 distal BP2-BP3                  | 105        | -0.018        | 0.099        | 0.857        |
| 22q11.2 proximal without LCR-A          | 178        | -0.020        | 0.077        | 0.792        |
| 13q12.12                                | 221        | -0.028        | 0.061        | 0.645        |
| 15q13.3 BP4-BP5 ( <i>CHRNA7</i> )       | 56         | -0.058        | 0.140        | 0.678        |
| 4p16.3                                  | 9          | -0.092        | 0.349        | 0.791        |
| 17q12                                   | 95         | -0.097        | 0.101        | 0.339        |
| 2q13                                    | 68         | -0.120        | 0.122        | 0.324        |
| 16p11.2 distal BP1-BP2-BP3              | 10         | -0.131        | 0.418        | 0.754        |
| <b>22q11.2 proximal with LCR-A</b>      | <b>254</b> | <b>-0.136</b> | <b>0.063</b> | <b>0.031</b> |
| 15q13.1q13.2 BP3-BP4                    | 20         | -0.166        | 0.238        | 0.485        |
| 2q11.2                                  | 28         | -0.219        | 0.135        | 0.105        |
| 7q11.23 WBS                             | 13         | -0.242        | 0.353        | 0.493        |
| 22q11.2 distal type I                   | 9          | -0.276        | 0.331        | 0.405        |
| 15q11.2q13.1 BP2 BP3 PWS/AS             | 17         | -0.327        | 0.299        | 0.275        |
| 17p11.2 Potocki Lupski/SMS              | 5          | -0.674        | 0.476        | 0.157        |
| 10q22q23 ( <i>NRG3</i> , <i>GRID1</i> ) | 7          | -0.691        | 0.517        | 0.181        |
| 3q29 proximal                           | 6          | -0.903        | 0.701        | 0.197        |

MDD = major depressive disorder; PRS = polygenic risk score.

$\beta$  coefficients correspond to standardized effect sizes, with values of 0.2, 0.5, and 0.8 indicating small, medium, and large effects, respectively.

Bolded estimates signify nominal significance ( $p < 0.05$ ).

CRS = CNV risk score; LCR = low-copy repeat; BP = breakpoint; TAR = thrombocytopenia-absent radius; WH = Wolf-Hirschhorn; WBS = Williams-Beuren syndrome; PWS/AS = Prader-Willi syndrome / Angelman syndrome; SMS = Smith-Magenis syndrome.

**Table S10** CNV×PRS interactions between individual recurrent deletions and GAD PRS

| CNV                            | N        | $\beta$       | SE           | <i>p</i>     |
|--------------------------------|----------|---------------|--------------|--------------|
| 17q11.2 NF1                    | 10       | 0.363         | 0.417        | 0.384        |
| 22q11.2 proximal with LCR-A    | 10       | 0.358         | 0.359        | 0.320        |
| DMRT1                          | 13       | 0.281         | 0.270        | 0.299        |
| 3q29 distal                    | 9        | 0.257         | 0.291        | 0.376        |
| 15q13.3 BP4.5 BP5 CHRNA7       | 8        | 0.109         | 0.598        | 0.856        |
| 1q21.1 distal TAR              | 10       | 0.108         | 0.315        | 0.732        |
| 22q11.2 distal type II         | 40       | 0.104         | 0.158        | 0.509        |
| 2q13                           | 54       | 0.084         | 0.163        | 0.605        |
| 10q11.21q11.23                 | 54       | 0.064         | 0.116        | 0.579        |
| 16p12.1                        | 228      | 0.061         | 0.067        | 0.367        |
| CRYL1                          | 360      | 0.020         | 0.054        | 0.718        |
| 15q11.2                        | 1553     | 0.016         | 0.026        | 0.532        |
| 1q21.1 distal                  | 93       | 0.011         | 0.106        | 0.919        |
| 16p13.11                       | 117      | 0.001         | 0.086        | 0.995        |
| ZNF92                          | 2639     | -0.005        | 0.019        | 0.790        |
| 16p11.2 distal BP2 BP3         | 51       | -0.013        | 0.126        | 0.918        |
| 17q12                          | 6        | -0.017        | 0.459        | 0.970        |
| 2q13 NPHP1                     | 2259     | -0.026        | 0.021        | 0.213        |
| 17p12 HNPP CMT1A               | 220      | -0.033        | 0.073        | 0.645        |
| 2q11.2                         | 28       | -0.060        | 0.166        | 0.719        |
| NRXN1                          | 247      | -0.063        | 0.064        | 0.325        |
| 2q21.1 BUB1                    | 38       | -0.081        | 0.176        | 0.647        |
| 4p16.3                         | 5        | -0.091        | 0.341        | 0.790        |
| 16p11.2 proximal BP4 BP5       | 96       | -0.118        | 0.094        | 0.209        |
| 1q21.1 TAR                     | 130      | -0.126        | 0.090        | 0.163        |
| 13q12.12                       | 79       | -0.179        | 0.125        | 0.154        |
| 22q11.2 proximal without LCR-A | 27       | -0.179        | 0.179        | 0.319        |
| VPS13B                         | 33       | -0.182        | 0.187        | 0.330        |
| 16q23.3                        | 13       | -0.184        | 0.269        | 0.493        |
| 15q13.1q13.2 BP3 BP4           | 9        | -0.278        | 0.432        | 0.519        |
| 15q13.1q13.3 BP3 BP5           | 47       | -0.304        | 0.168        | 0.070        |
| SIM1                           | 5        | -0.340        | 1.210        | 0.778        |
| <b>PAFAH1B1</b>                | <b>5</b> | <b>-1.484</b> | <b>0.584</b> | <b>0.011</b> |

GAD = generalized anxiety disorder; PRS = polygenic risk score.

$\beta$  coefficients correspond to standardized effect sizes, with values of 0.2, 0.5, and 0.8 indicating small, medium, and large effects, respectively.

Bolded estimates signify nominal significance ( $p < 0.05$ ).

CRS = CNV risk score; LCR = low-copy repeat; BP = breakpoint; TAR = thrombocytopenia-absent radius.

**Table S11** CNV×PRS interactions between individual recurrent duplications and GAD PRS

| CNV                            | N         | $\beta$       | SE           | <i>p</i>     |
|--------------------------------|-----------|---------------|--------------|--------------|
| 17q21.31                       | 6         | 0.613         | 0.661        | 0.354        |
| 15q12 GABRB3 GABRA5            | 7         | 0.603         | 0.513        | 0.240        |
| YWHAE                          | 9         | 0.375         | 0.339        | 0.268        |
| <b>15q13.3 BP4 BP5 CHRNA7</b>  | <b>56</b> | <b>0.339</b>  | <b>0.141</b> | <b>0.016</b> |
| 22q11.2 distal type II         | 47        | 0.262         | 0.155        | 0.091        |
| 15q11.2q13.1 BP2 BP3 PWS.AS    | 17        | 0.217         | 0.308        | 0.481        |
| 3q29 proximal                  | 6         | 0.203         | 0.468        | 0.664        |
| 16p11.2 distal BP1 BP2 BP3     | 10        | 0.187         | 0.387        | 0.629        |
| 2q21.1 BUB1                    | 54        | 0.171         | 0.153        | 0.262        |
| 10q22q23 NRG3 GRID1            | 7         | 0.127         | 0.609        | 0.835        |
| 16q23.3                        | 55        | 0.104         | 0.116        | 0.367        |
| 22q11.2 distal type III        | 178       | 0.081         | 0.077        | 0.292        |
| ZMYM5                          | 66        | 0.063         | 0.106        | 0.553        |
| 2q13 NPHP1                     | 784       | 0.043         | 0.036        | 0.241        |
| 1q21.1 distal TAR              | 15        | 0.042         | 0.304        | 0.889        |
| 15q13.1q13.3 BP3 BP5           | 214       | 0.042         | 0.072        | 0.558        |
| 16p13.11                       | 775       | 0.037         | 0.035        | 0.287        |
| 16p12.1                        | 173       | 0.030         | 0.078        | 0.697        |
| 1q21.1 TAR                     | 388       | 0.011         | 0.051        | 0.828        |
| 15q13.3 BP4.5 BP5 CHRNA7       | 2660      | 0.009         | 0.019        | 0.630        |
| 15q11.2                        | 1849      | 0.003         | 0.023        | 0.884        |
| 16p11.2 distal BP2 BP3         | 105       | -0.011        | 0.095        | 0.907        |
| 1q21.1 distal                  | 148       | -0.012        | 0.081        | 0.878        |
| 22q11.2 distal type I          | 9         | -0.021        | 0.450        | 0.962        |
| DMRT1                          | 15        | -0.031        | 0.252        | 0.901        |
| 17q12                          | 95        | -0.032        | 0.100        | 0.753        |
| 16p11.2 proximal BP4 BP5       | 135       | -0.032        | 0.081        | 0.695        |
| 17p12 HNPP CMT1A               | 116       | -0.039        | 0.095        | 0.681        |
| 22q11.2 proximal without LCR-A | 178       | -0.042        | 0.082        | 0.612        |
| 13q12.12                       | 221       | -0.047        | 0.067        | 0.487        |
| 2q13                           | 68        | -0.064        | 0.118        | 0.588        |
| ZNF92                          | 202       | -0.067        | 0.065        | 0.300        |
| 15q24                          | 8         | -0.081        | 0.589        | 0.890        |
| 2q11.2                         | 28        | -0.083        | 0.203        | 0.683        |
| 8p23.1                         | 6         | -0.083        | 0.239        | 0.727        |
| 22q11.2 proximal with LCR-A    | 254       | -0.084        | 0.063        | 0.182        |
| 10q11.21q11.23                 | 38        | -0.087        | 0.170        | 0.610        |
| 15q13.1q13.2 BP3 BP4           | 20        | -0.172        | 0.293        | 0.558        |
| 7q11.23 distal                 | 22        | -0.178        | 0.225        | 0.427        |
| 4p16.3                         | 9         | -0.337        | 0.330        | 0.307        |
| 17p11.2 Potocki Lupski SMS     | 5         | -0.417        | 0.406        | 0.304        |
| <b>7q11.23 WBS</b>             | <b>13</b> | <b>-0.628</b> | <b>0.255</b> | <b>0.014</b> |

GAD = generalized anxiety disorder; PRS = polygenic risk score.

$\beta$  coefficients correspond to standardized effect sizes, with values of 0.2, 0.5, and 0.8 indicating small, medium, and large effects, respectively.

Bolded estimates signify nominal significance ( $p < 0.05$ ).

CRS = CNV risk score; LCR = low-copy repeat; BP = breakpoint; TAR = thrombocytopenia-absent radius; WH = Wolf-Hirschhorn; WBS = Williams-Beuren syndrome; PWS/AS = Prader-Willi syndrome / Angelman syndrome; SMS = Smith-Magenis syndrome.

Figure S2 Nominally significant CNV×PRS interactions for individual recurrent CNVs on mood/anxiety factor scores

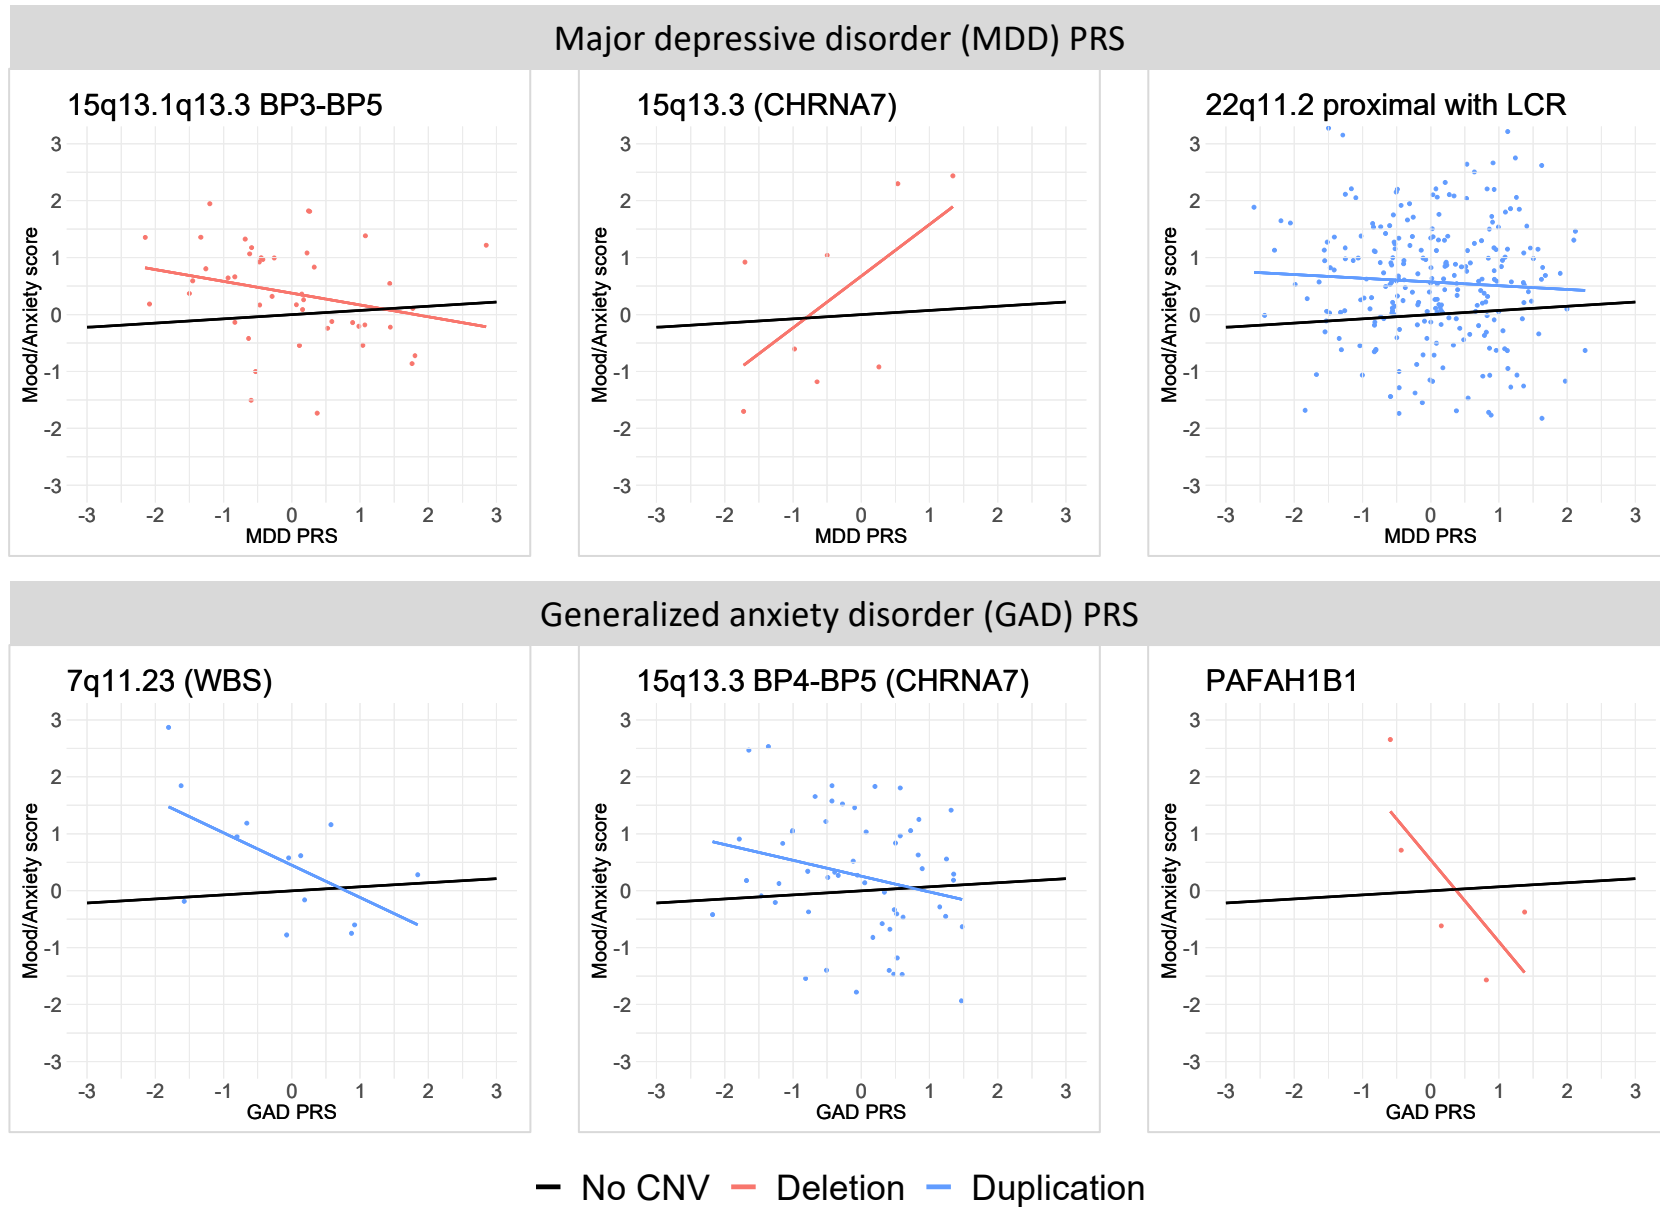

CNV = copy number variant; PRS = polygenic risk score; MDD = major depressive disorder; GAD = generalized anxiety disorder; BP = breakpoint; LCR = low-copy repeat; WBS = Williams-Beuren syndrome.
